# Supplementary material
Source: Springer Nature journal article supplement (https://www.springermedizin.de/resource/supplementary/12879_2009_1023_MOESM1_ESM.pdf/9442410)

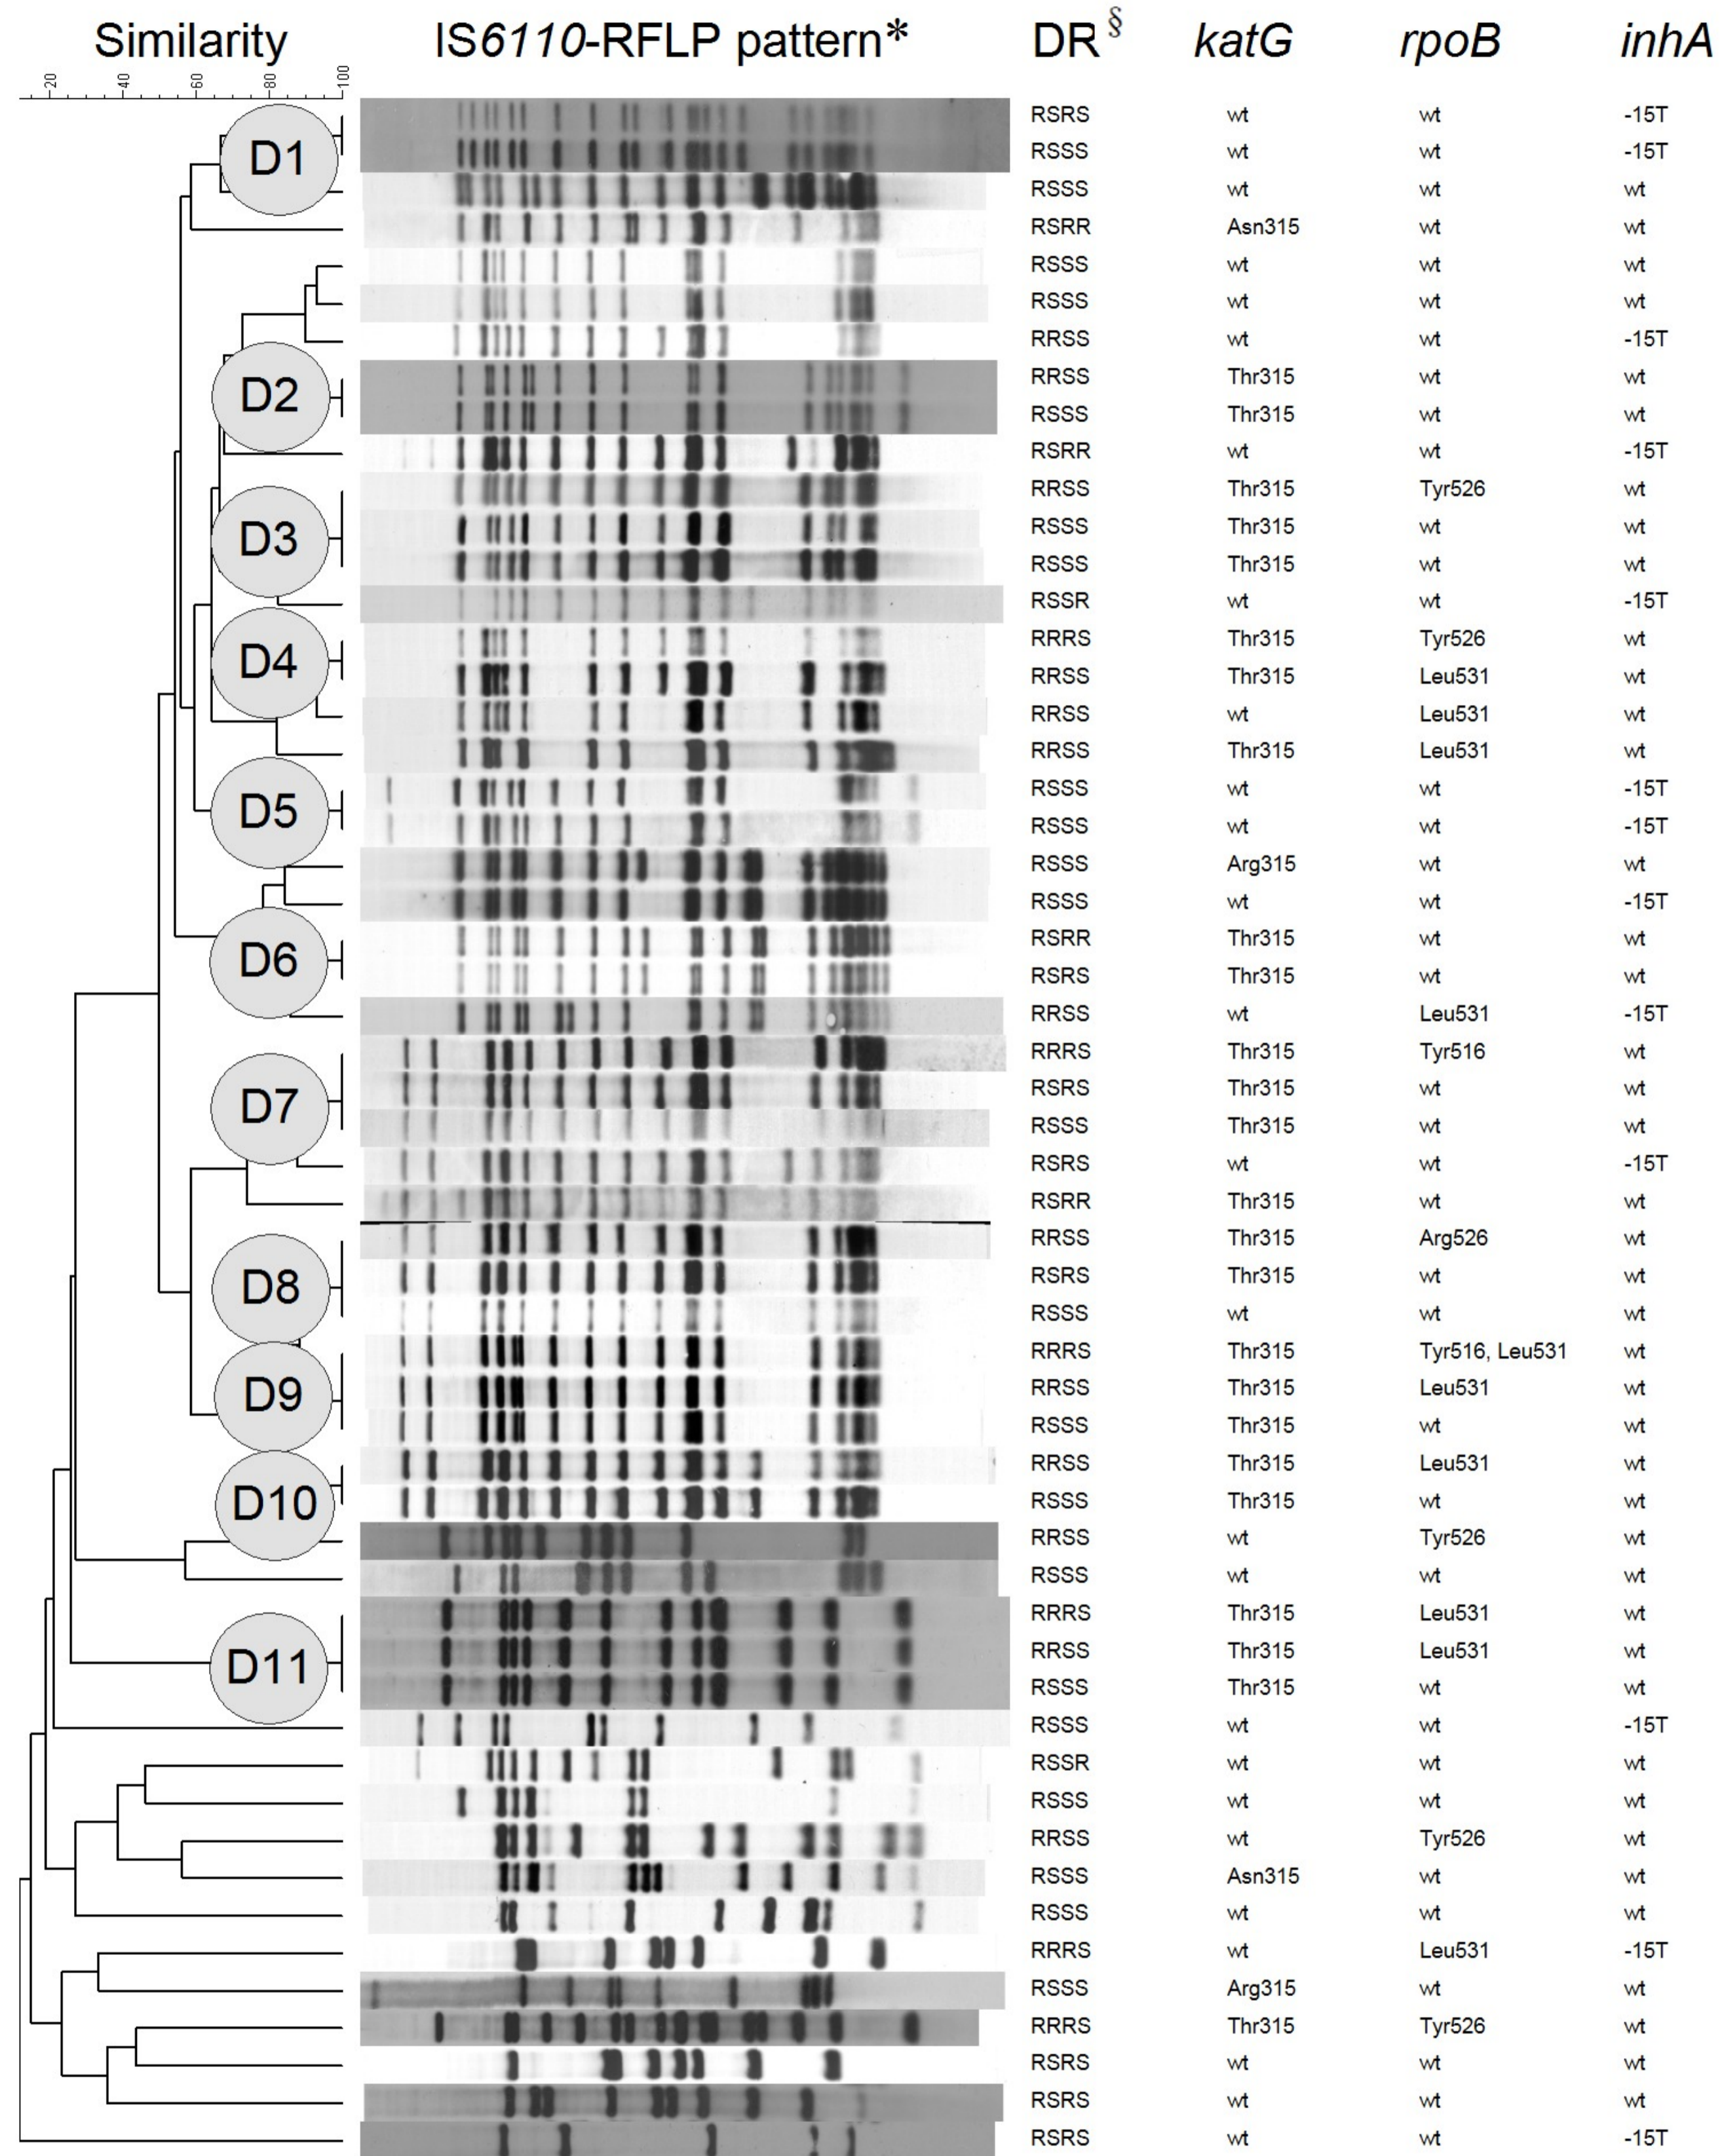

Deqing

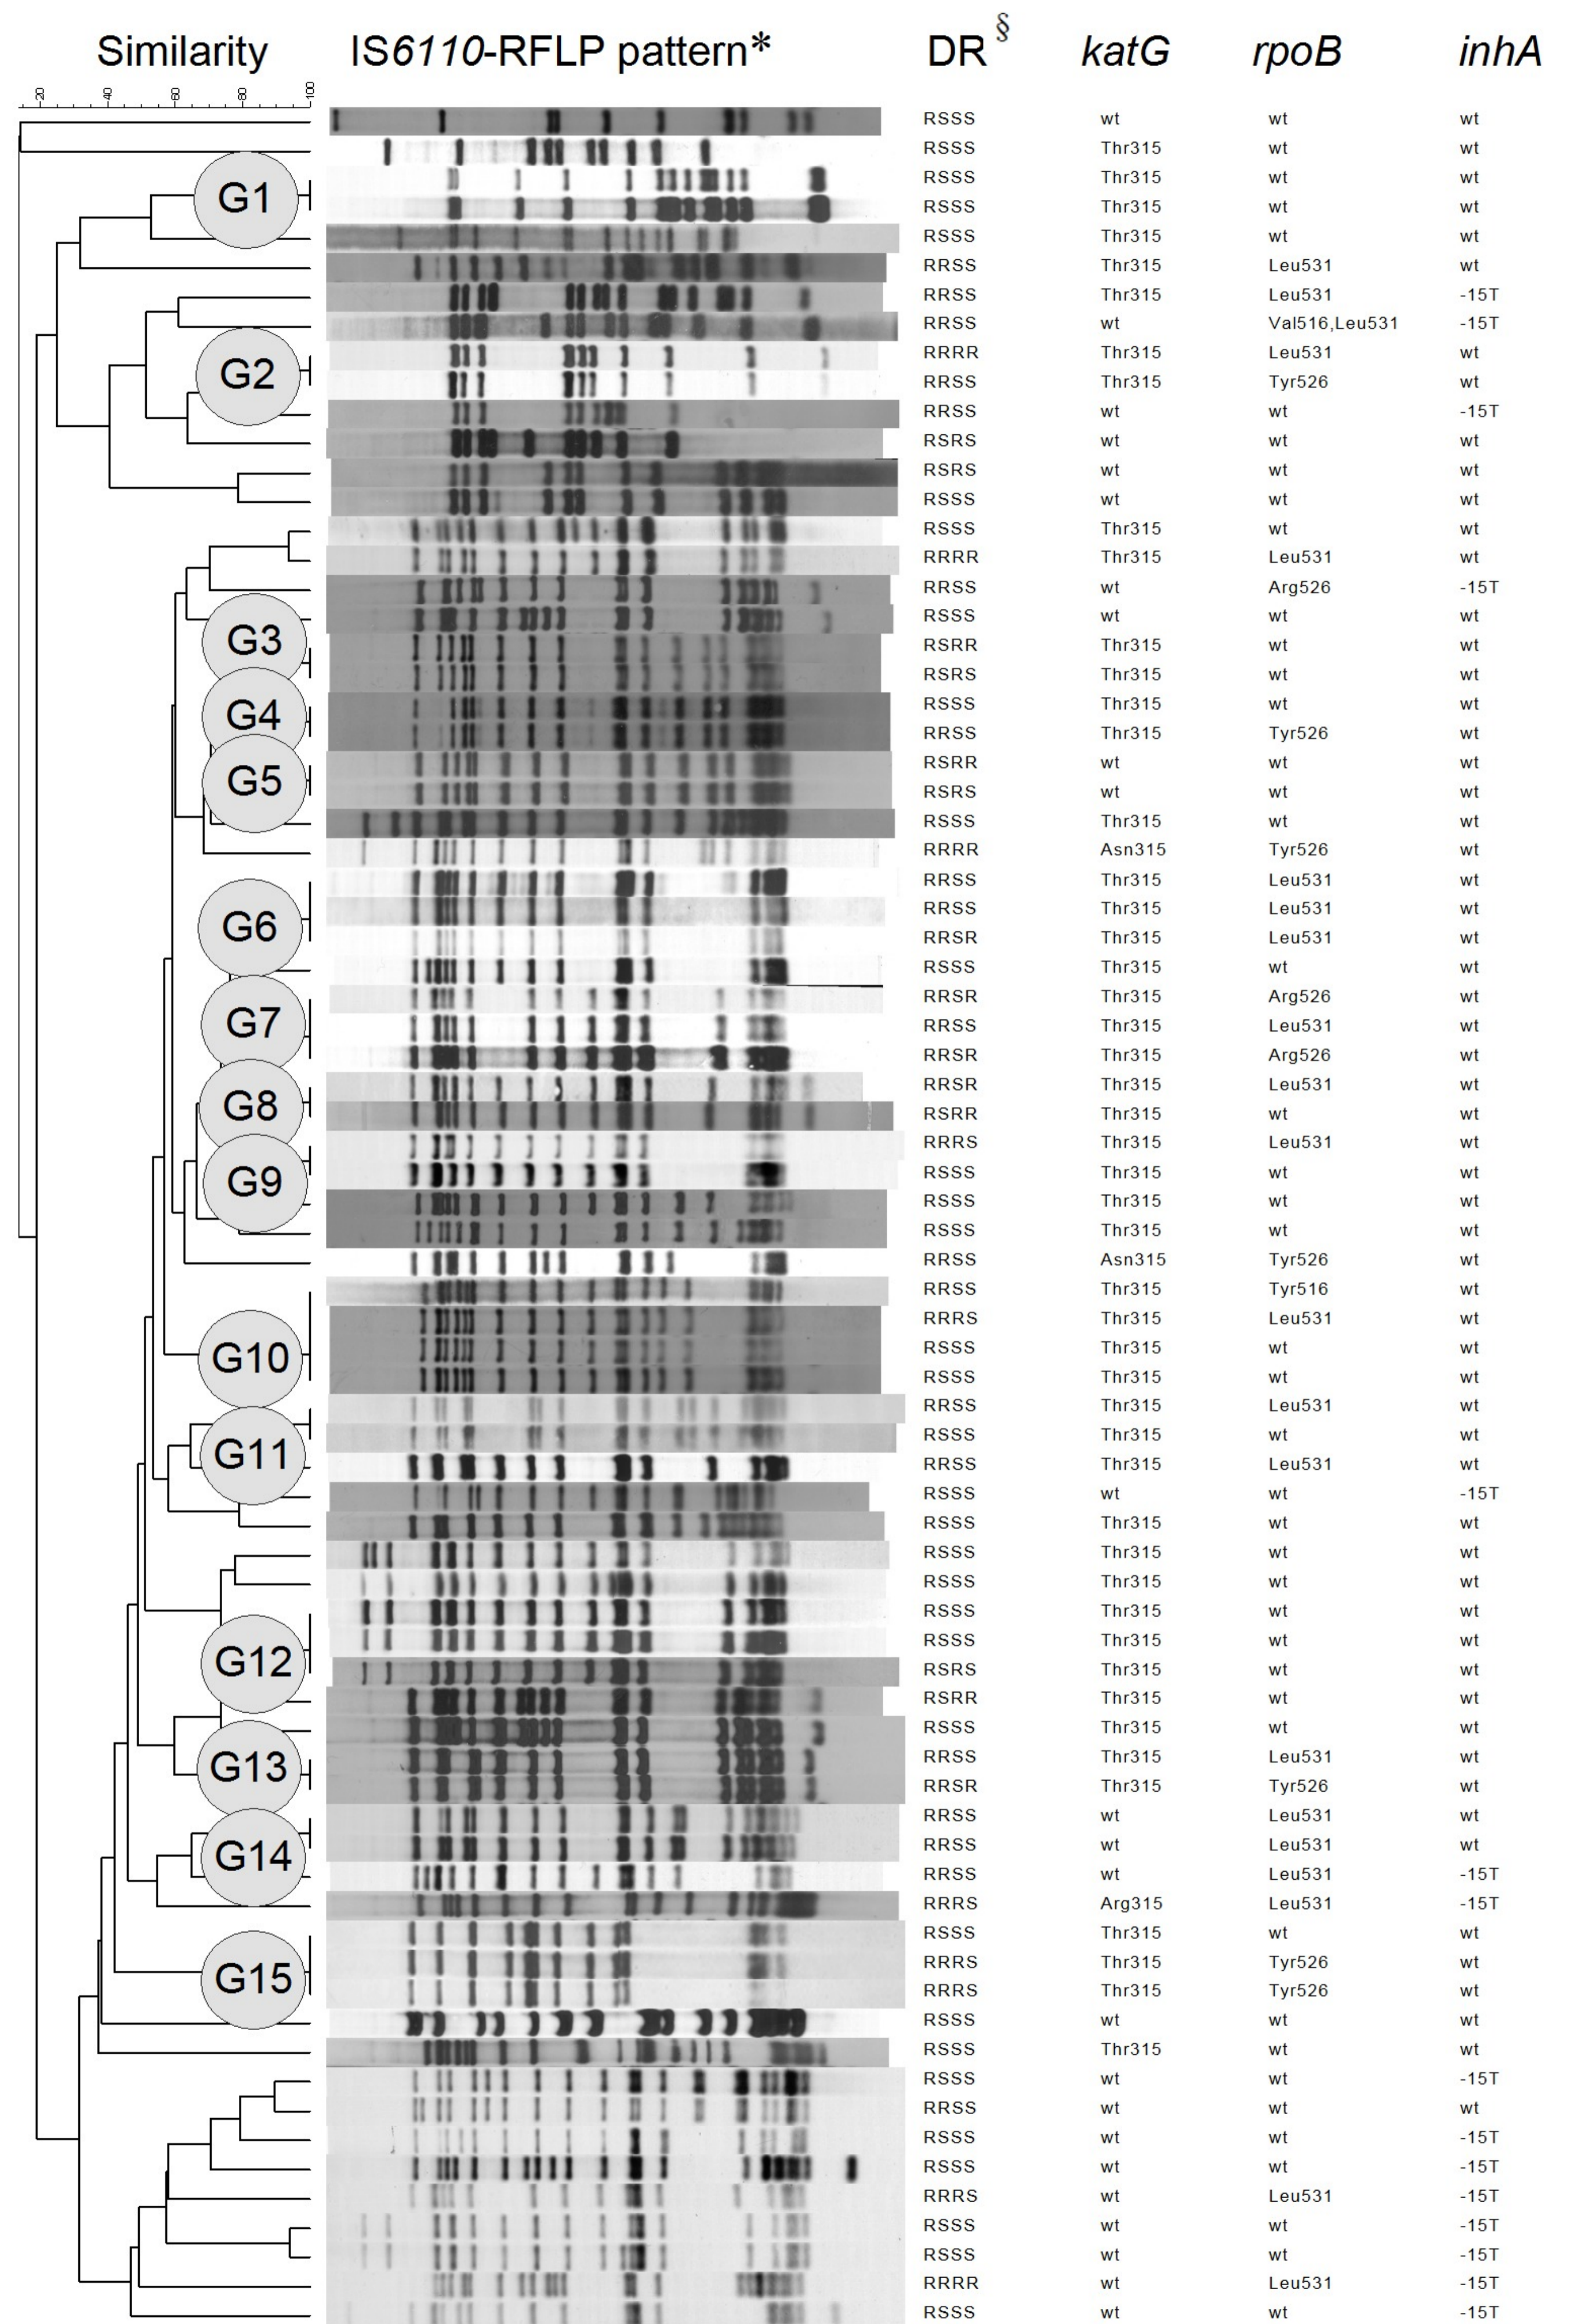

Guanyun

Supplement: MOESM1 [file 9442410]
